# Supplementary material for: Compaction of a zirconium metal–organic framework (UiO-66) for high density hydrogen storage applications
Source: Royal Society of Chemistry journal article supplement (doi:10.1039/c8ta09227c), 2018-01-01
Supplement: c8ta09227c1.pdf [file c8ta09227c1.pdf]

## SUPPLEMENTARY INFORMATION

### Compaction of a zirconium metal-organic framework (UiO-66) for high density hydrogen storage applications

Sonwabo E. Bambalaza<sup>a,b</sup>, Henrietta W. Langmi<sup>a\*</sup>, Robert Mokaya<sup>c</sup>, Nicholas M. Musyoka<sup>a</sup>, Jianwei Ren<sup>a,d</sup>, Lindiwe E. Khotseng<sup>b</sup>

<sup>a</sup>HySA Infrastructure Centre of Competence, Energy Centre, Council for Scientific and Industrial Research (CSIR), PO Box 395, Pretoria 0001, South Africa.

<sup>b</sup>Faculty of Natural Science, University of the Western Cape, Bellville, Cape Town 7535, South Africa.

<sup>c</sup>School of Chemistry, University of Nottingham, University Park, Nottingham, NG7 2RD, UK.

<sup>d</sup>Mechanical Engineering Science Department, University of Johannesburg, Johannesburg, South Africa.

\*Corresponding e-mail: [hlangmi@csir.co.za](mailto:hlangmi@csir.co.za) (H. W. Langmi)

#### Content:

**Figure S1:** SEM image of UiO-66 powder before compaction.

**Figure S2:** Thermal decomposition of UiO-66 showing multi-step decomposition from 25 up to 1000 °C under air flow.

**Figure S3:** N<sub>2</sub> adsorption isotherms and pore size distribution (insert) for powdered and compacted UiO-66 crystals degassed at 80 °C and 200 °C for 32 hours under vacuum ( $\sim 10^{-7}$  bar).

**Figure S4:** Pore size distribution for powdered and compacted UiO-66 in the macropore region.

**Figure S5:** Excess gravimetric H<sub>2</sub> uptake (wt%) for compacted (i.e., pellet) UiO-66 up to 100 bar measured at 77 K showing both adsorption and desorption isotherms. The isotherms show that the uptake of H<sub>2</sub> is reversible.

**Figure S6:** Adsorbed H<sub>2</sub> volume fractions ( $V_{ad}/V_{bulk}$ ) for UiO-66 powder, UiO-66 pellet, and for an empty cylinder obtained at 77 K up to 100 bar, calculated from the ideal gas law of H<sub>2</sub> gas ( $PV = nRT$ ).

**Table S1:** Comparison of textural properties for UiO-66 powder and compacted samples degassed at 80 and 200 °C for 32 hours.

**Table S2:** Textural properties, packing density, and H<sub>2</sub> uptake (at 77.3 K and 25 bar or 298 K for values in parenthesis) measured for powder and compacted UiO-66.

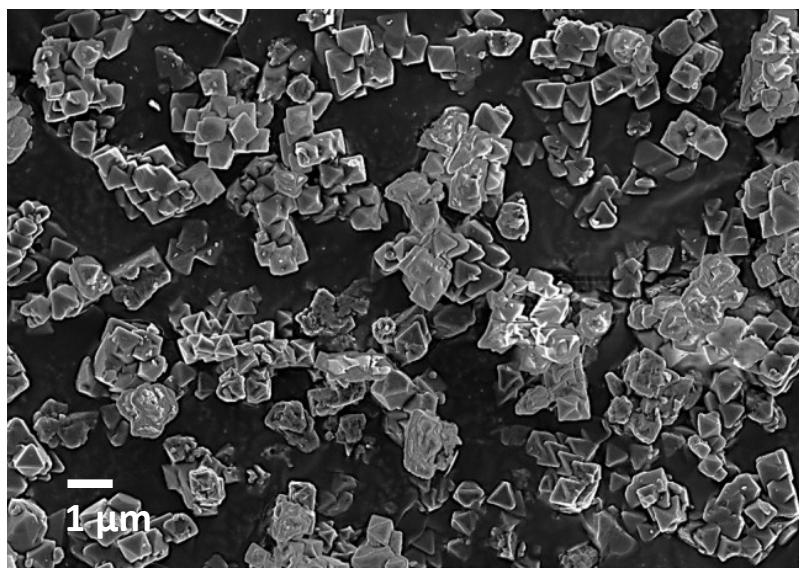

**Figure S1:** SEM image of UiO-66 powder before compaction.

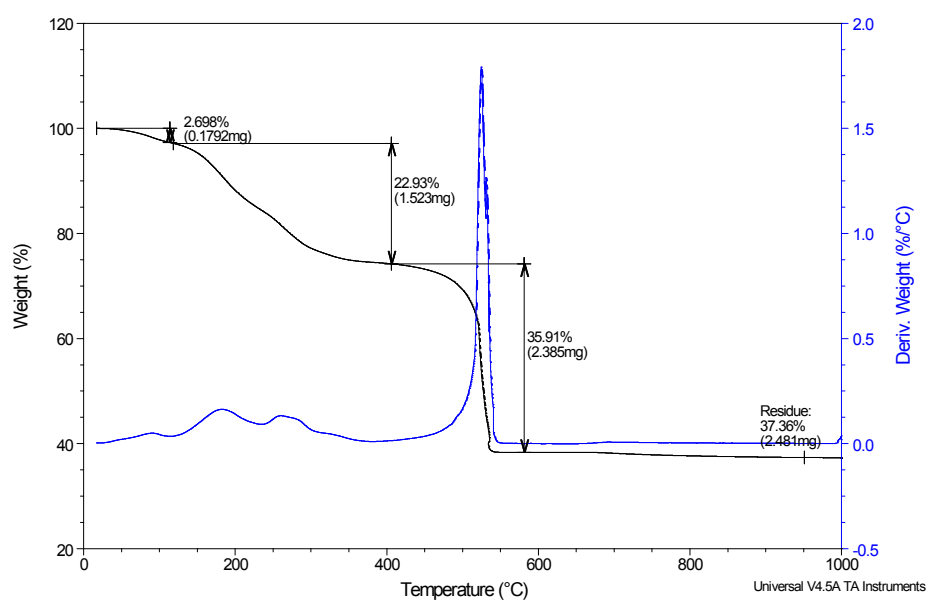

**Figure S2:** Thermal decomposition of UiO-66 showing multi-step decomposition from 25 up to 1000 °C under air flow.

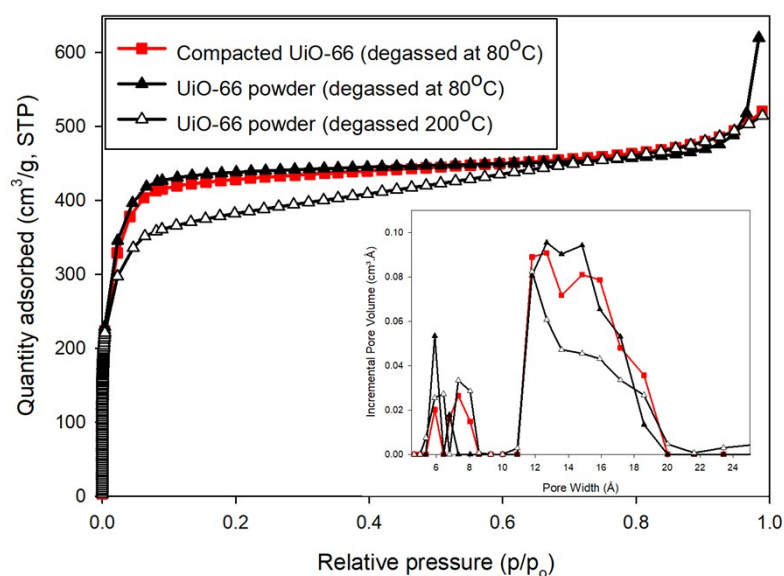

**Figure S3:**  $N_2$  adsorption isotherms and pore size distribution (insert) for powdered and compacted UiO-66 crystals degassed at  $80^\circ\text{C}$  and  $200^\circ\text{C}$  for 32 hours under vacuum ( $\sim 10^{-7}$  bar).

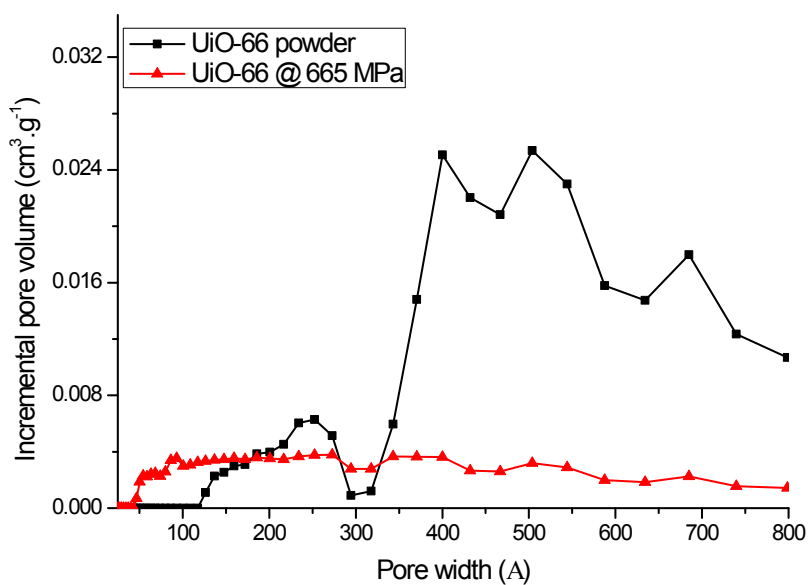

**Figure S4:** Pore size distribution for powdered and compacted UiO-66 in the macropore region.

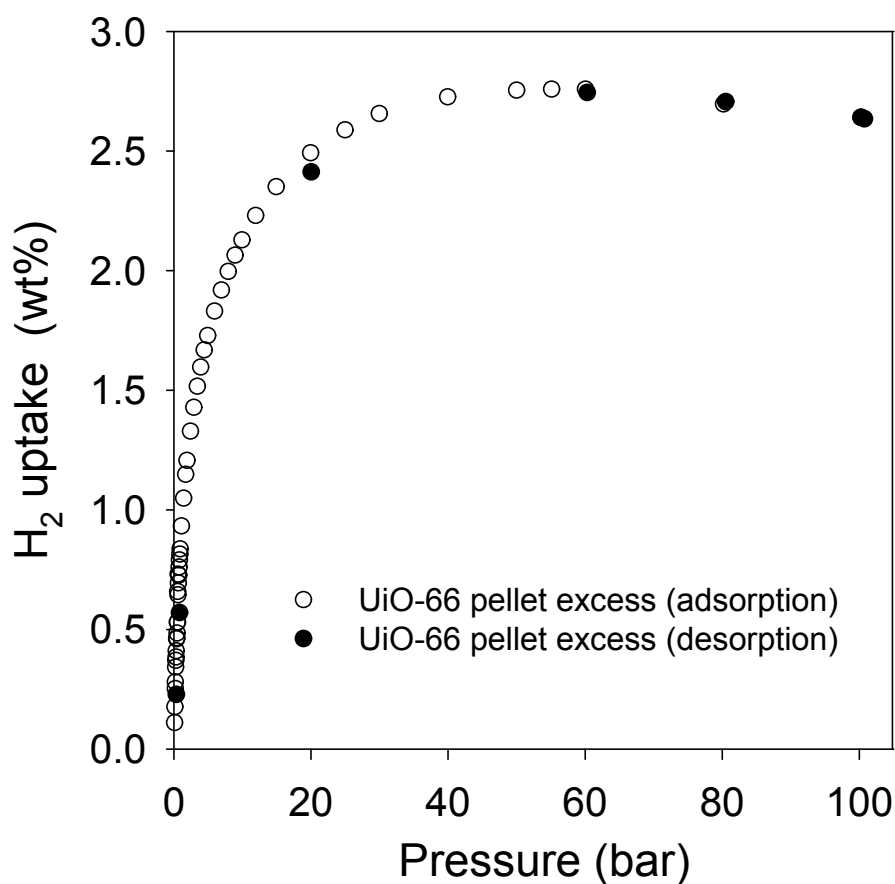

**Figure S5:** Excess gravimetric  $H_2$  uptake (wt%) for compacted (i.e., pellet) UiO-66 up to 100 bar measured at 77 K showing both adsorption and desorption isotherms. The isotherms show that the uptake of  $H_2$  is reversible.

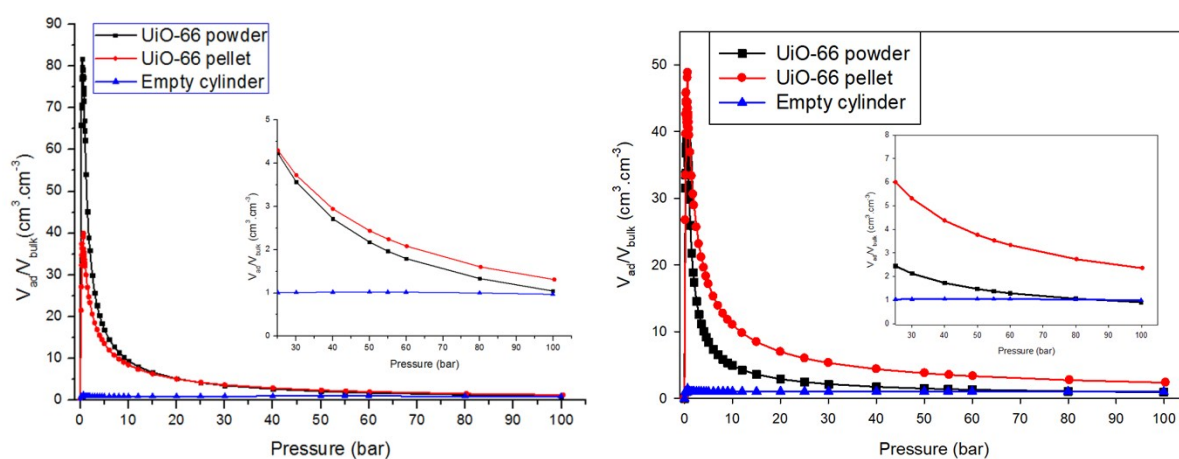

**Figure S6:** Adsorbed  $H_2$  volume fractions ( $V_{ad}/V_{bulk}$ ) for UiO-66 powder, UiO-66 pellet, and for an empty cylinder obtained at 77 K up to 100 bar, calculated from the ideal gas law of  $H_2$  gas ( $PV = nRT$ ).

**Table S1:** Comparison of textural properties for UiO-66 powder and compacted samples degassed at 80 and 200 °C for 32 hours.

| Sample                 | BET Surface area (m <sup>2</sup> .g <sup>-1</sup> ) | Pore volume (cm <sup>3</sup> .g <sup>-1</sup> ) | Micropore surface area (m <sup>2</sup> .g <sup>-1</sup> ) <sup>a</sup> | Micropore volume (cm <sup>3</sup> .g <sup>-1</sup> ) <sup>b</sup> |
|------------------------|-----------------------------------------------------|-------------------------------------------------|------------------------------------------------------------------------|-------------------------------------------------------------------|
| UiO-66 powder (80 °C)  | 1737                                                | 0.96                                            | 1559 (90%)                                                             | 0.60 (63%)                                                        |
| UiO-66 pellet (80 °C)  | 1707                                                | 0.81                                            | 1484 (87%)                                                             | 0.57 (70%)                                                        |
| UiO-66 powder (200 °C) | 859                                                 | 0.56                                            | 671 (78%)                                                              | 0.27 (48%)                                                        |

<sup>a</sup>values in parentheses represent the percentage micropore surface area of the total BET surface area. <sup>b</sup>values in parentheses represent the percentage micropore volume of the total NLDFT pore volume.

**Table S2:** Textural properties, packing density, and H<sub>2</sub> uptake (at 77.3 K and 25 bar or 298 K for values in parenthesis) measured for powder and compacted UiO-66

| Sample        | Surface area <sup>a</sup> (m <sup>2</sup> .g <sup>-1</sup> ) | Pore volume <sup>b</sup> (cm <sup>3</sup> .g <sup>-1</sup> ) | Packing density (g.cm <sup>-3</sup> ) | Volumetric surface area (m <sup>2</sup> .mL <sup>-1</sup> ) <sup>c</sup> | Skeletal density (g.cm <sup>-3</sup> ) | Gravimetric H <sub>2</sub> uptake (wt%) |              | Volumetric H <sub>2</sub> capacity (g.L <sup>-1</sup> ) |                    |                    |
|---------------|--------------------------------------------------------------|--------------------------------------------------------------|---------------------------------------|--------------------------------------------------------------------------|----------------------------------------|-----------------------------------------|--------------|---------------------------------------------------------|--------------------|--------------------|
|               |                                                              |                                                              |                                       |                                                                          |                                        | Excess                                  | Total        | Excess <sup>d</sup>                                     | Total <sup>e</sup> | Total <sup>f</sup> |
| UiO-66 Powder | 1737<br>(1559, 90%)                                          | 0.96<br>(0.60, 63%)                                          | 0.57                                  | 990                                                                      | 1.65                                   | 2.6<br>(0.1)                            | 3.4<br>(0.3) | 15<br>(1)                                               | 19<br>(2)          | 34<br>(2)          |
| UiO-66 Pellet | 1707<br>(1484, 87%)                                          | 0.81<br>(0.57, 70%)                                          | 1.45                                  | 2475                                                                     | 1.78                                   | 2.6<br>(0.1)                            | 3.3<br>(0.3) | 38<br>(2)                                               | 48<br>(4)          | 35<br>(2)          |

<sup>a</sup>Values in parenthesis are micropore surface area and percentage micropore surface area of the total surface area. <sup>b</sup>Values in parenthesis are micropore volume and percentage micropore of the total pore volume. <sup>c</sup>Surface area obtained by multiplying the packing density with the BET surface area. <sup>d</sup>Excess volumetric capacity calculated from the packing density as per equation (2). <sup>e</sup>Total volumetric capacity calculated from the packing density as per equation (3). <sup>f</sup>Total volumetric H<sub>2</sub> capacity calculated using the single crystal (1.24 g.cm<sup>-3</sup>) and skeletal densities of UiO-66 as reported by <sup>37</sup>
